# Supplementary material
Source: PubMed Central journal article supplement (PMC6897367)
Supplement: NIHMS1543464-supplement-1.pdf [file NIHMS1543464-supplement-1.pdf]

**Supporting Information**

**The chemical synthesis of human milk oligosaccharides: lacto-*N*-tetraose (Gal $\beta$ 1 $\rightarrow$ 3GlcNAc $\beta$ 1 $\rightarrow$ 3Gal $\beta$ 1 $\rightarrow$ 4Glc)**

Mithila D. Bandara, Keith J. Stine, and Alexei V. Demchenko\*

*Department of Chemistry and Biochemistry, University of Missouri – St. Louis, One University Boulevard, St. Louis, Missouri 63121, USA*

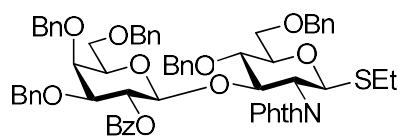

2

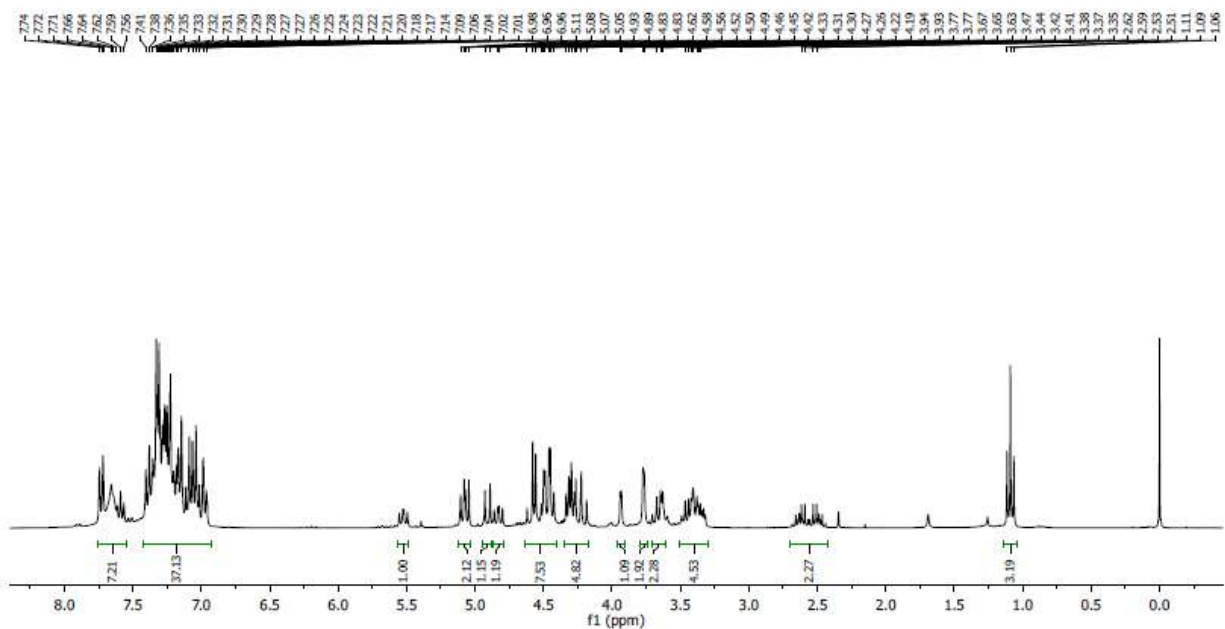

CDCl<sub>3</sub> 300 MHz

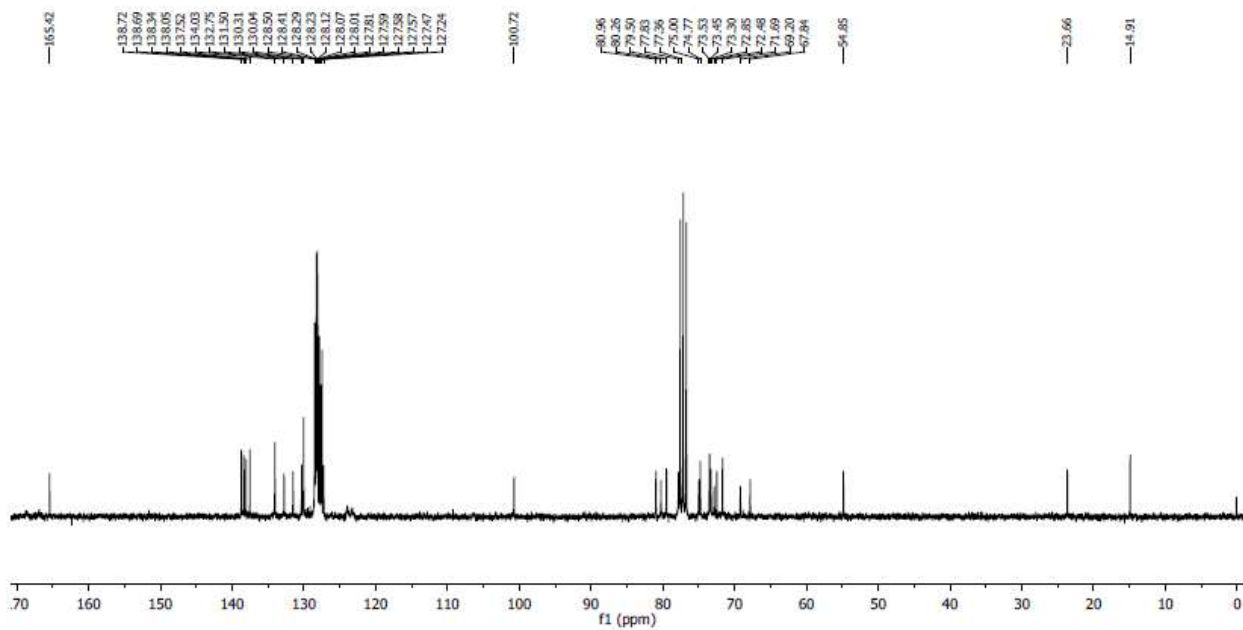

CDCl<sub>3</sub> 75 MHz

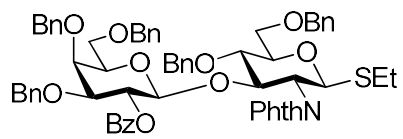

2

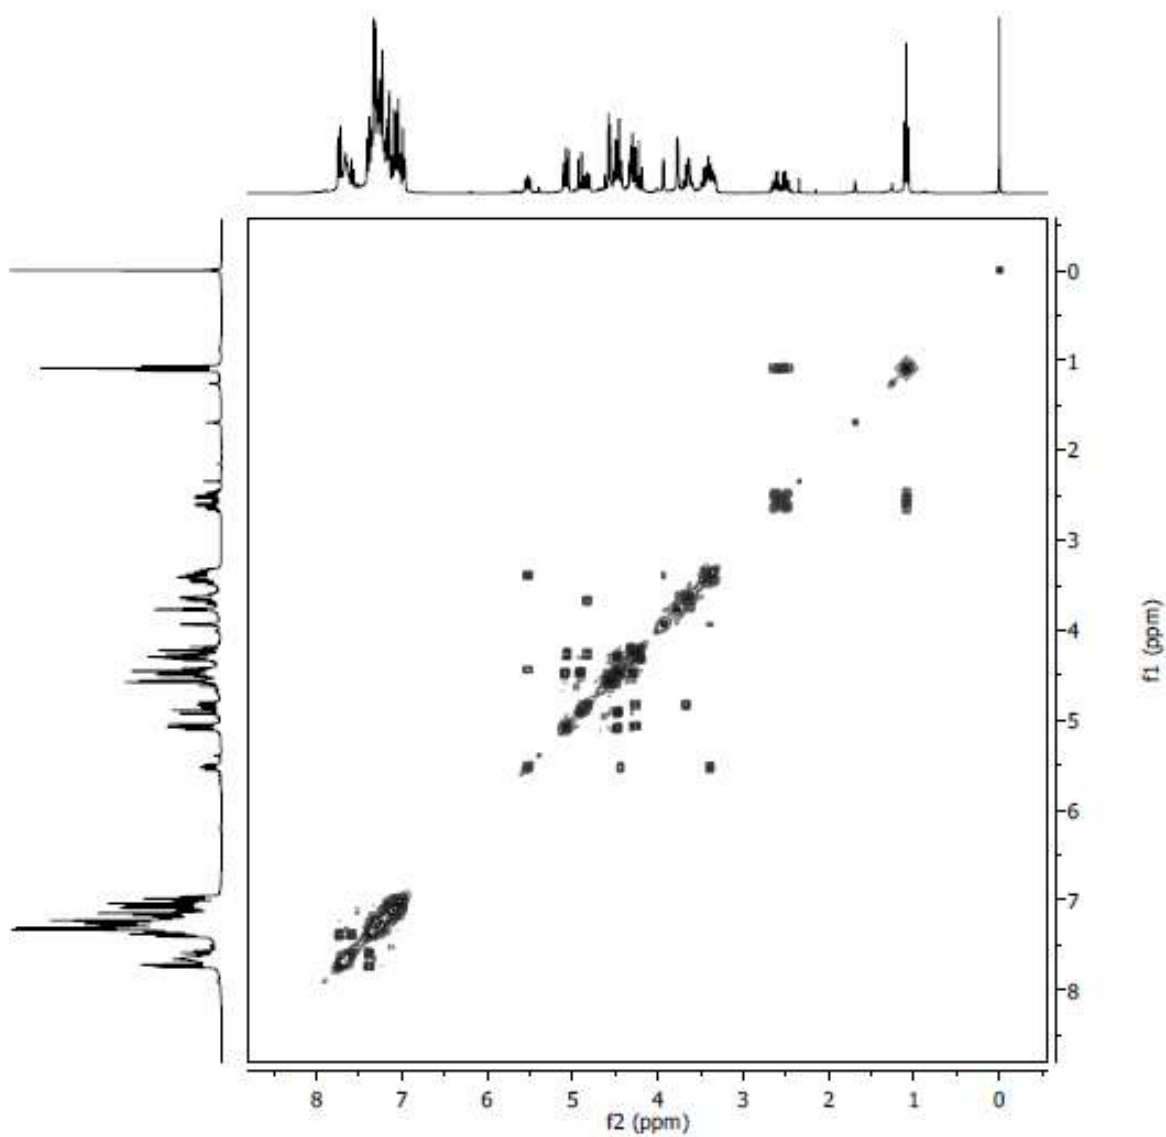

CDCl<sub>3</sub> 300 MHz

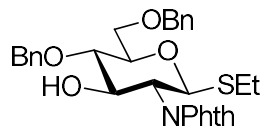

5

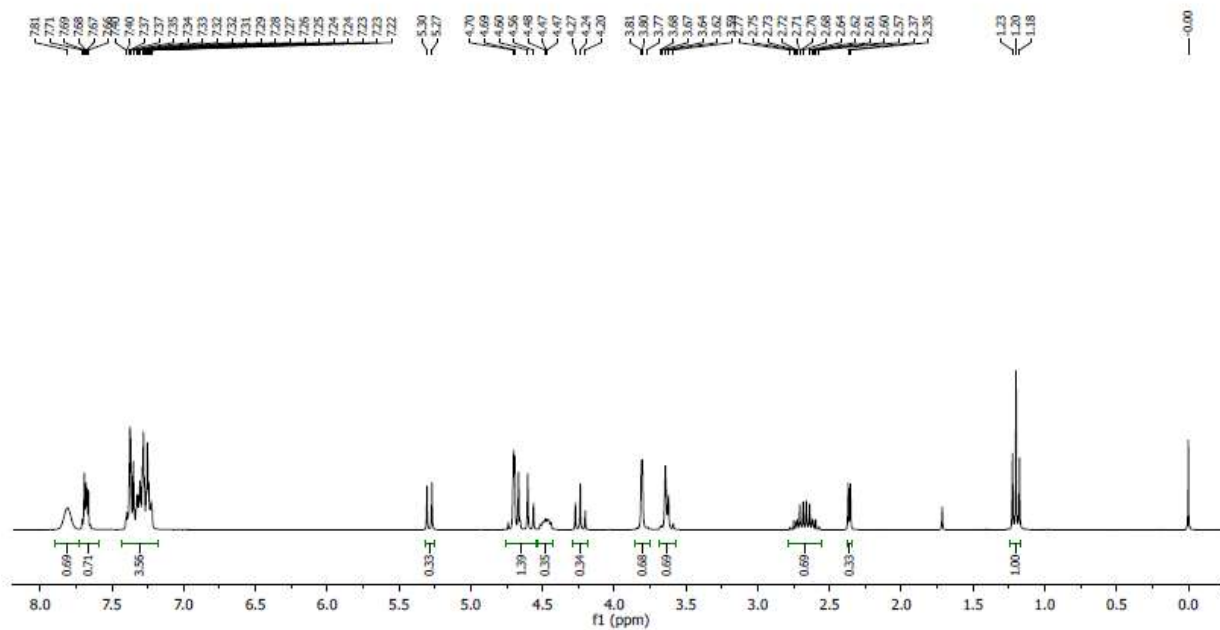

CDCl<sub>3</sub> 300 MHz

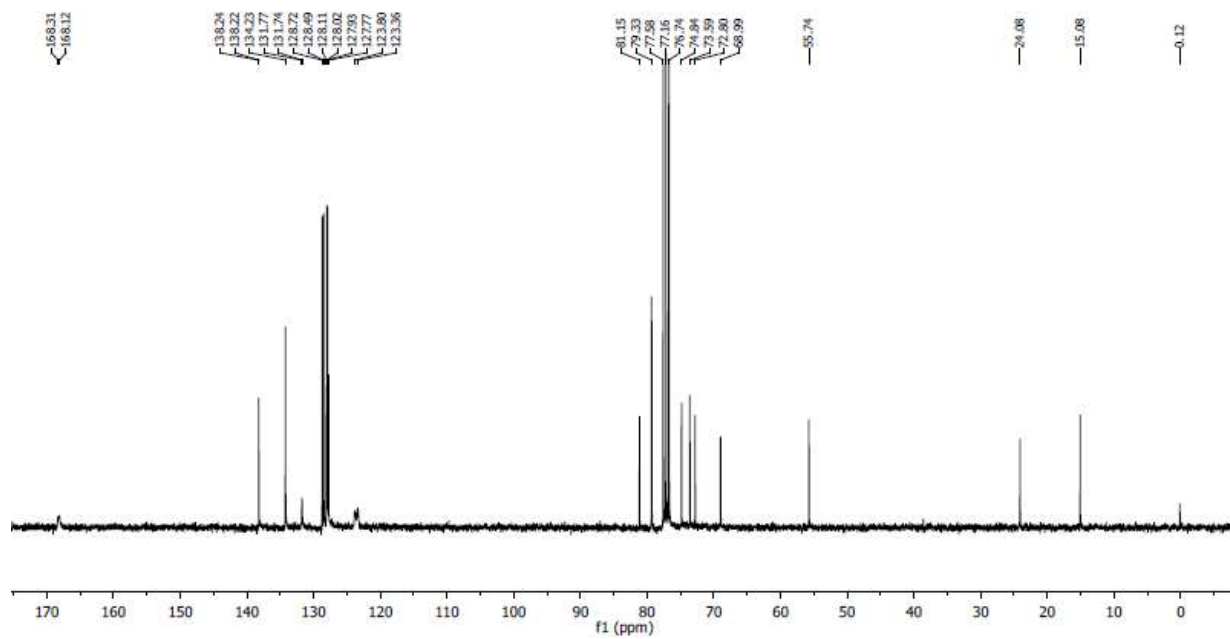

CDCl<sub>3</sub> 75 MHz

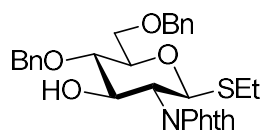

5

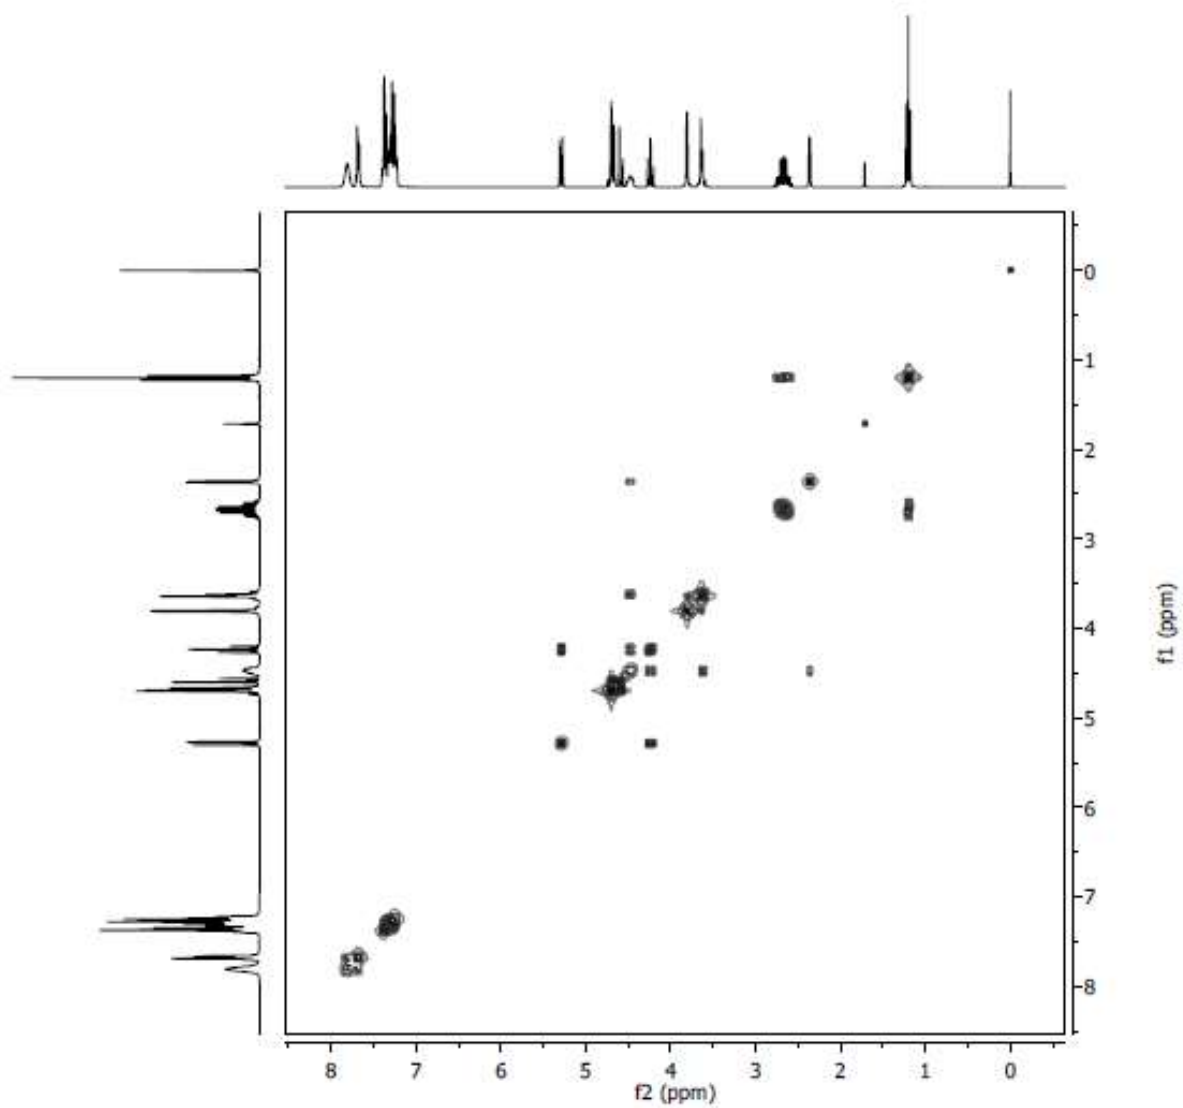

CDCl<sub>3</sub> 300 MHz

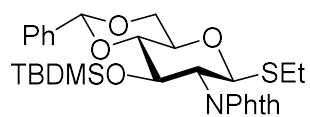

7

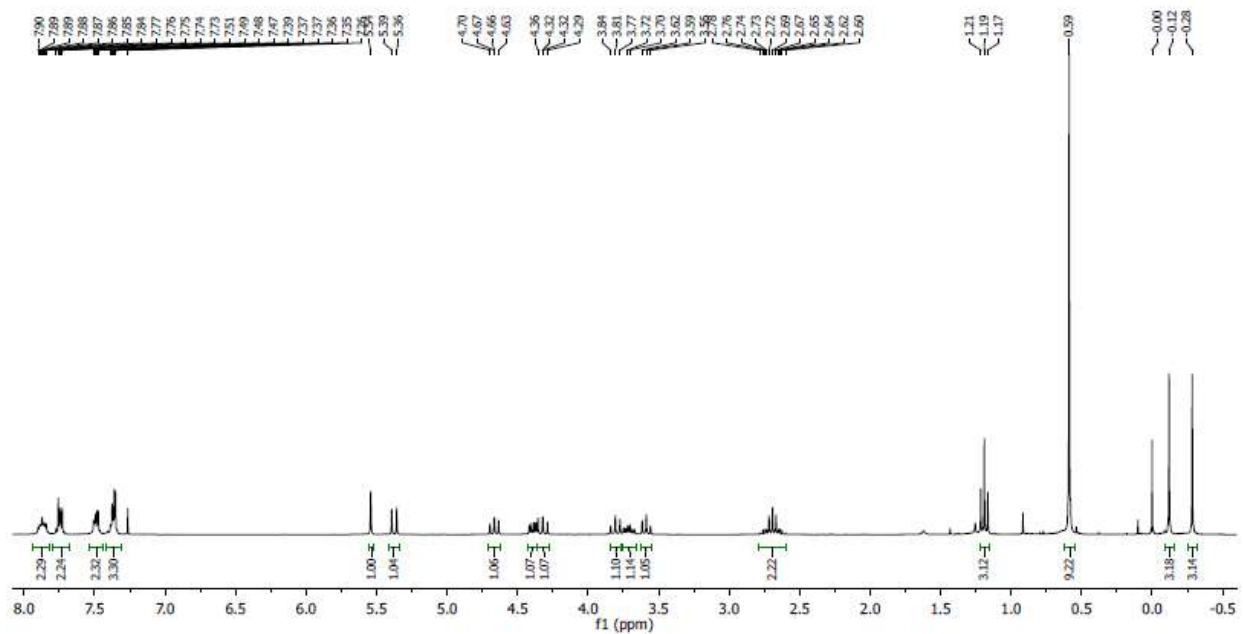

CDCl<sub>3</sub> 300 MHz

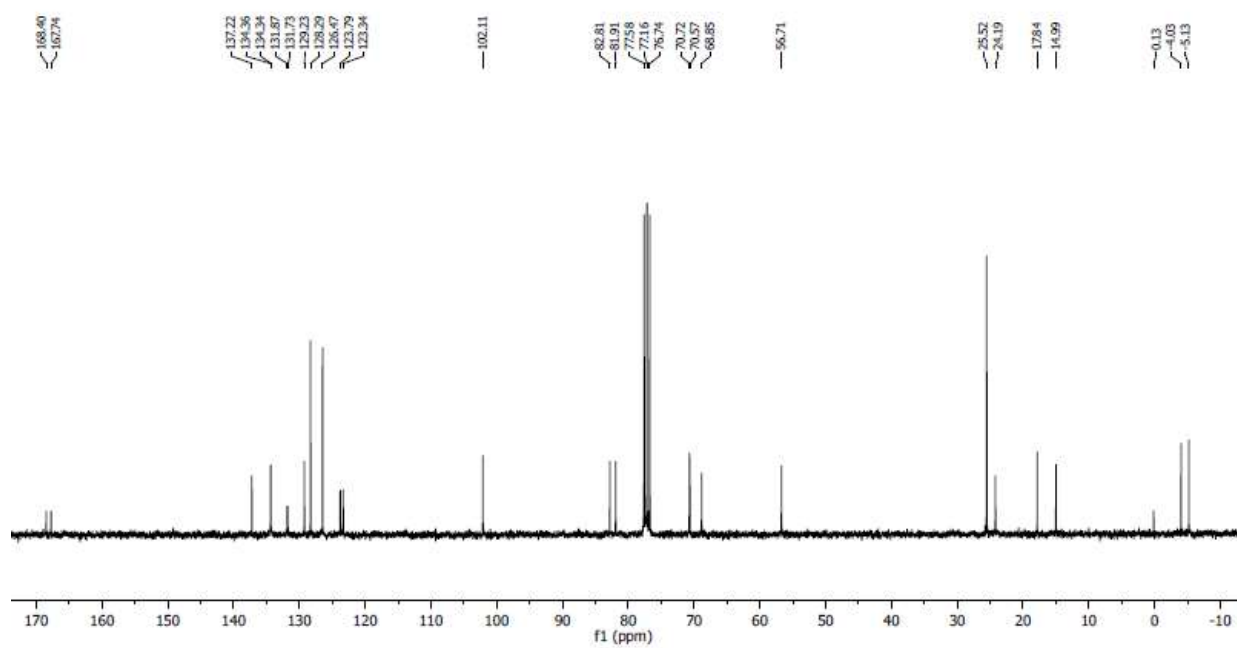

CDCl<sub>3</sub> 75 MHz

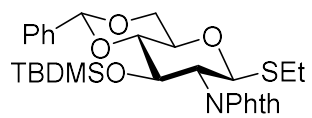

7

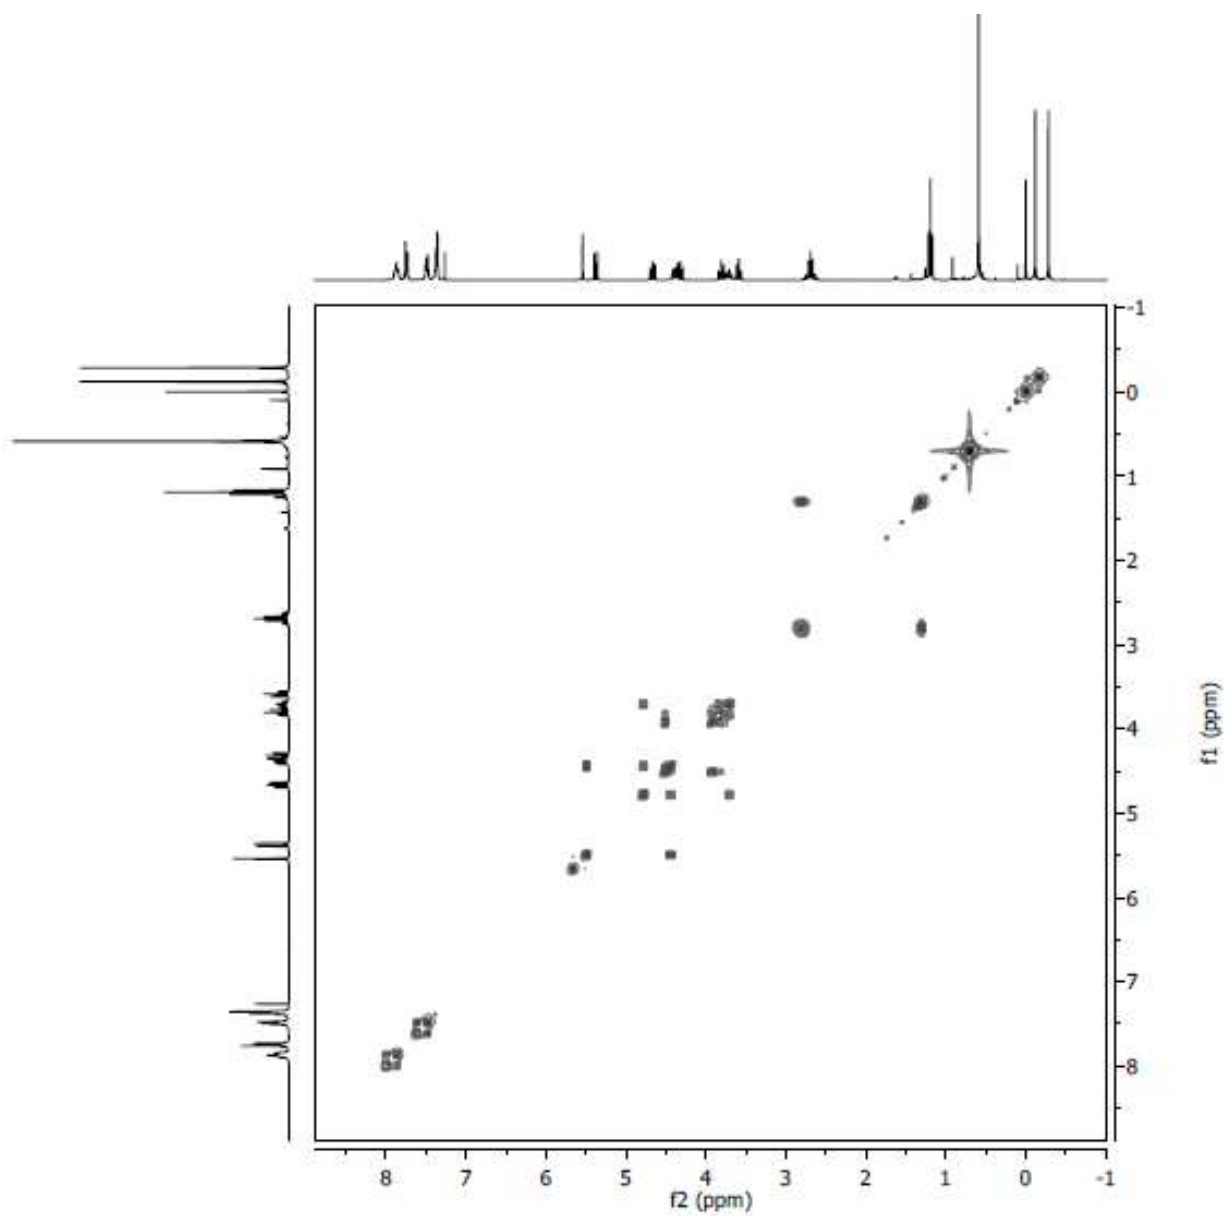

CDCl<sub>3</sub> 300 MHz

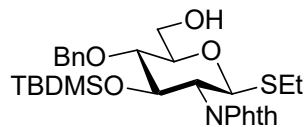

8

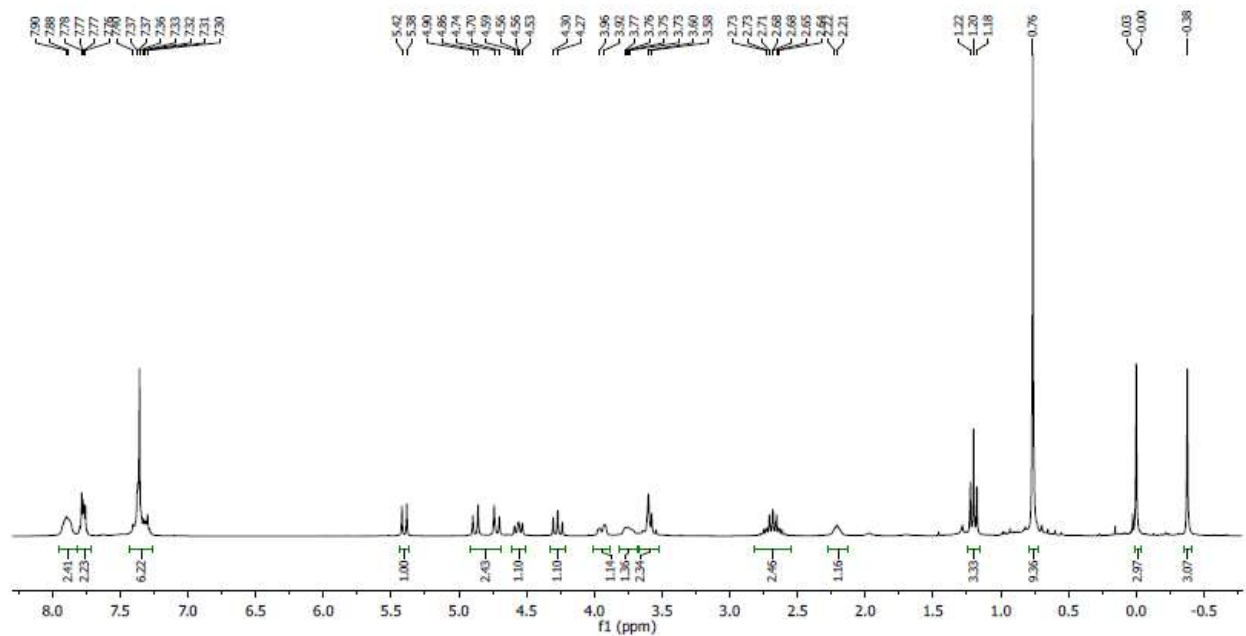

CDCl<sub>3</sub> 300 MHz

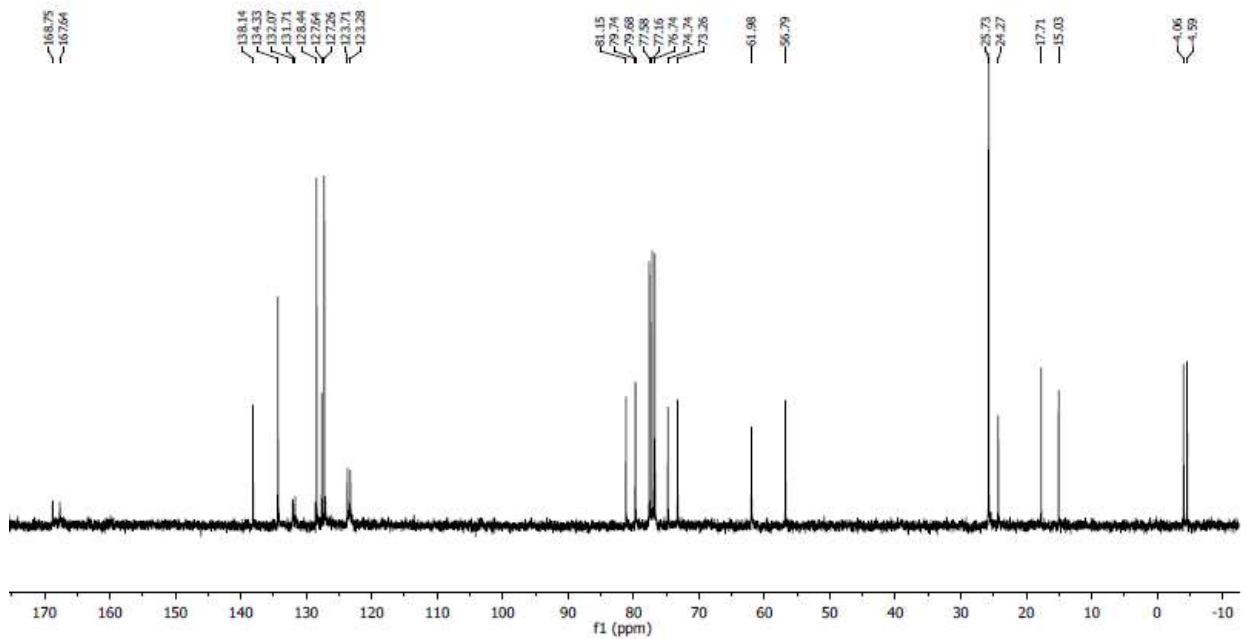

CDCl<sub>3</sub> 75 MHz





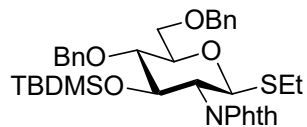

9

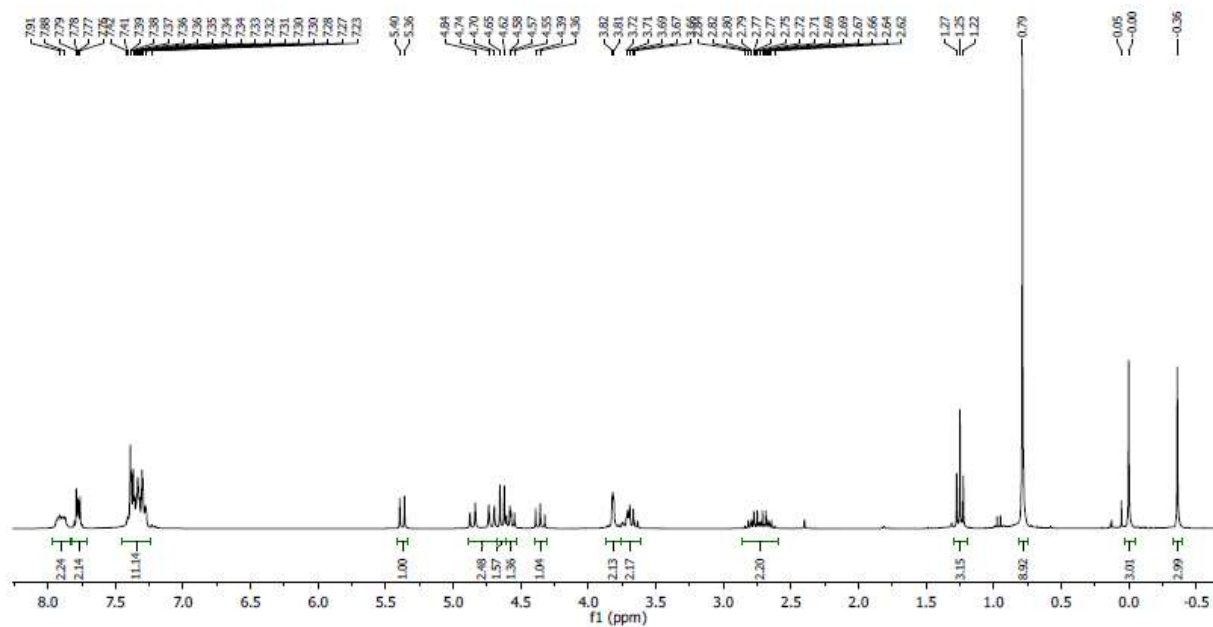

CDCl<sub>3</sub> 300 MHz

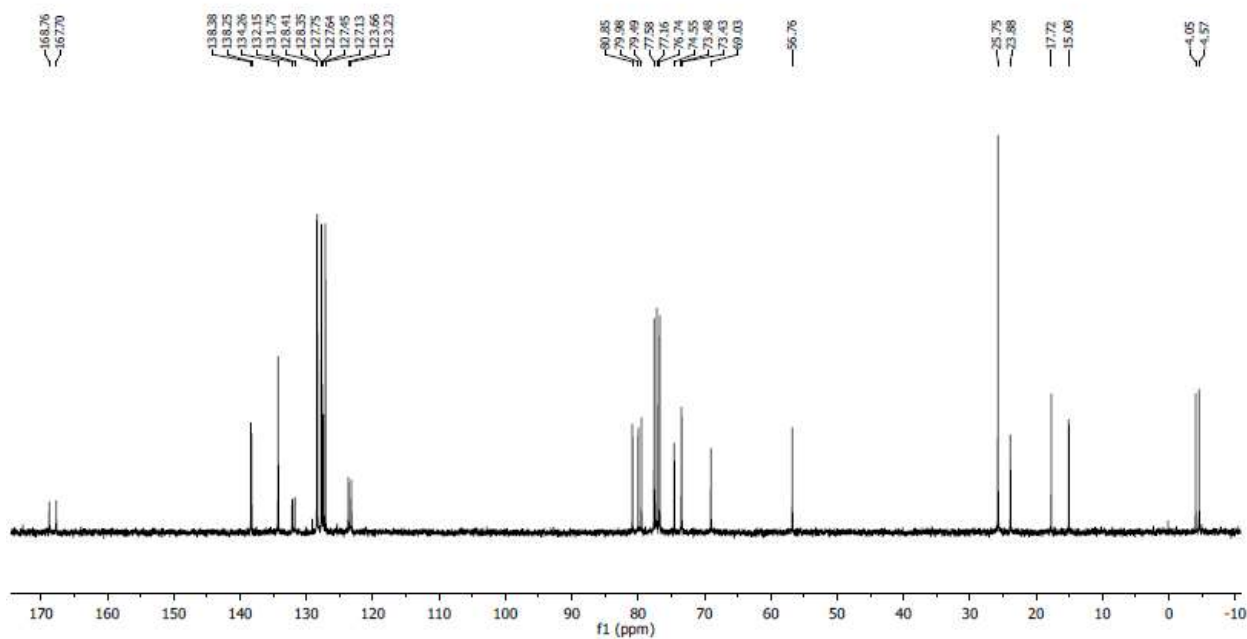

CDCl<sub>3</sub> 75 MHz

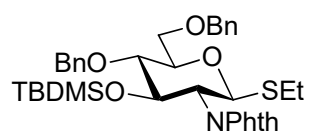

9

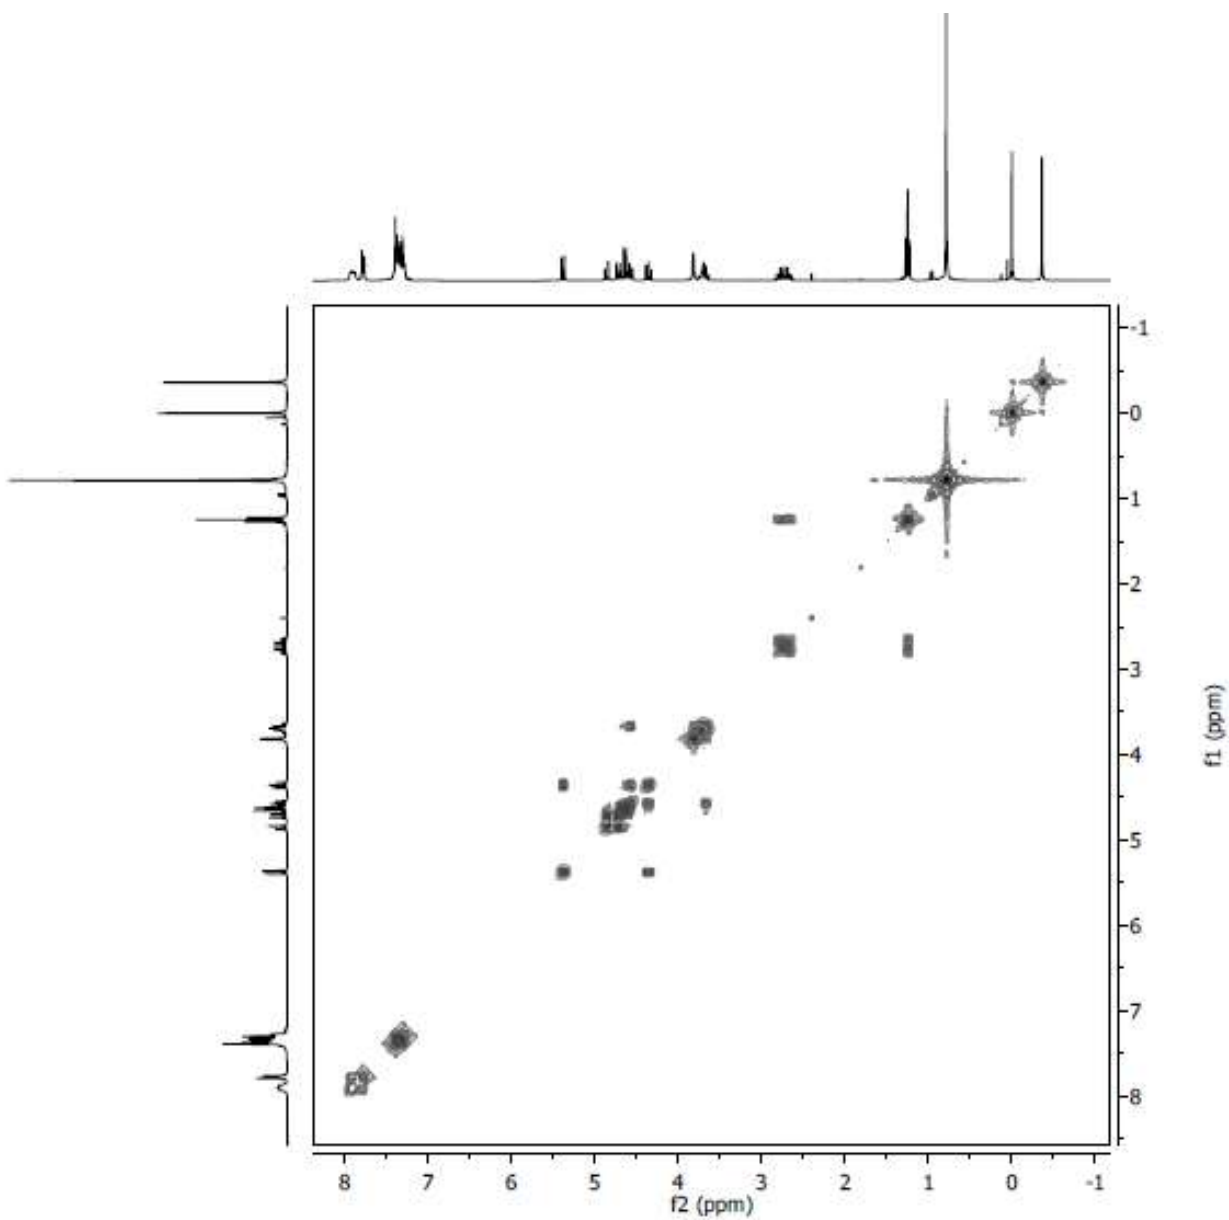

CDCl<sub>3</sub> 300 MHz

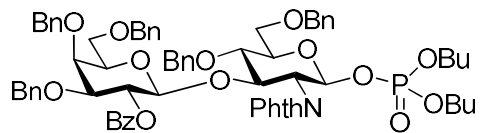

10

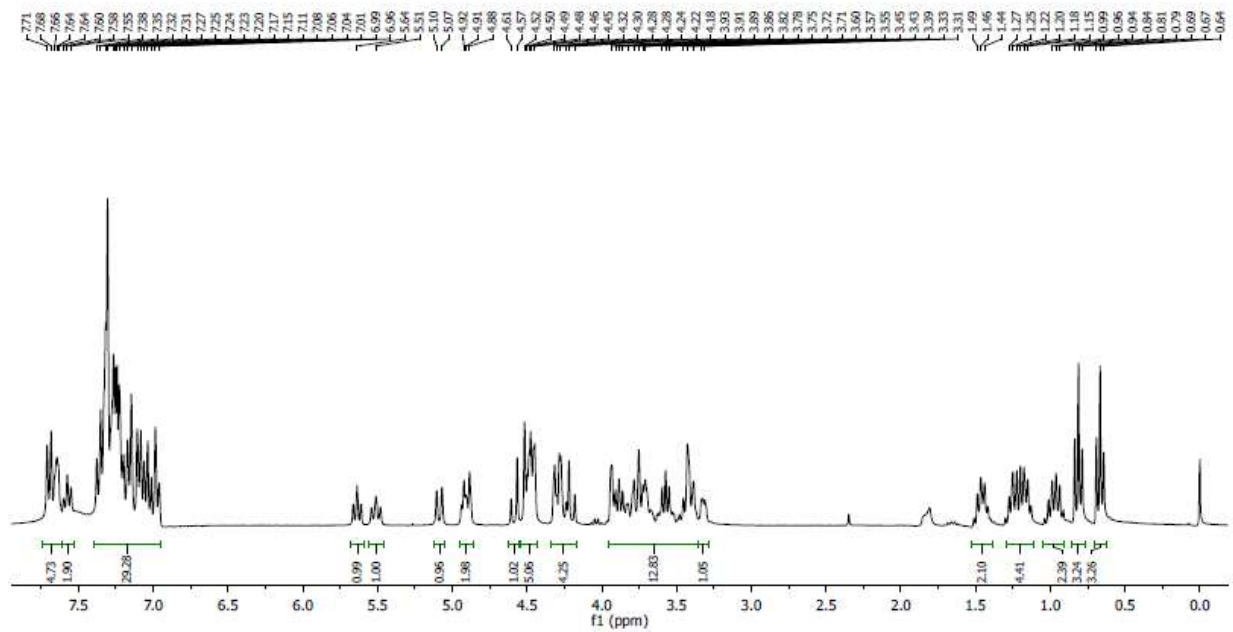

CDCl<sub>3</sub> 300 MHz

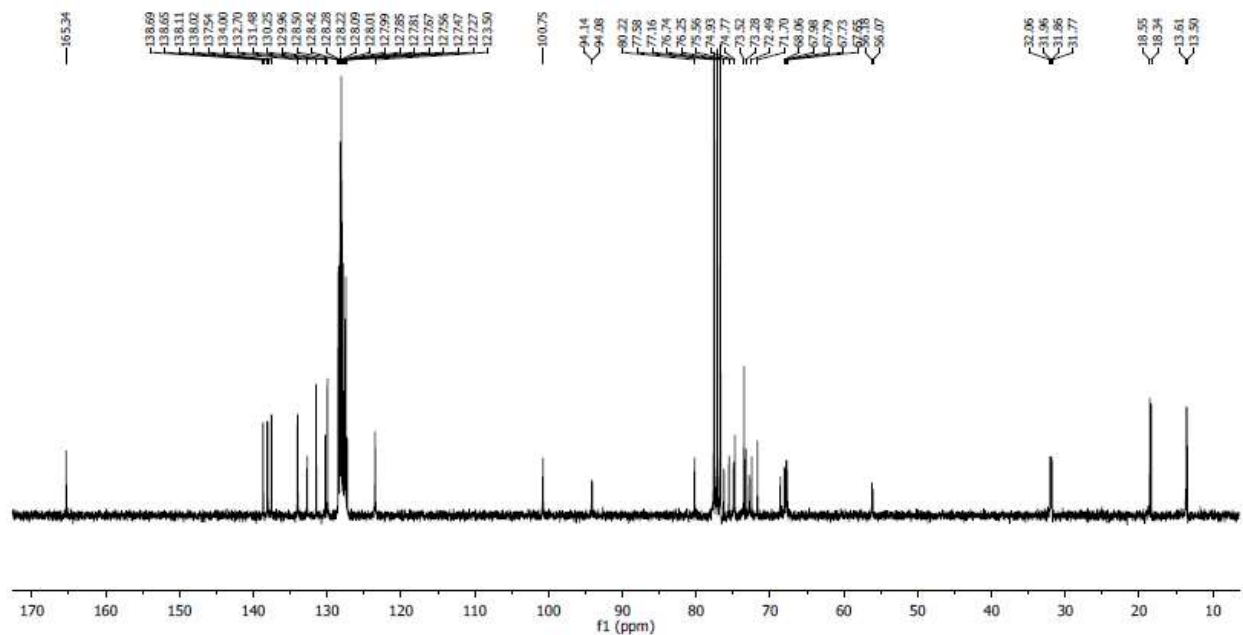

CDCl<sub>3</sub> 75 MHz

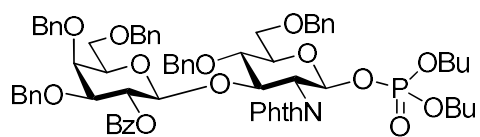

10

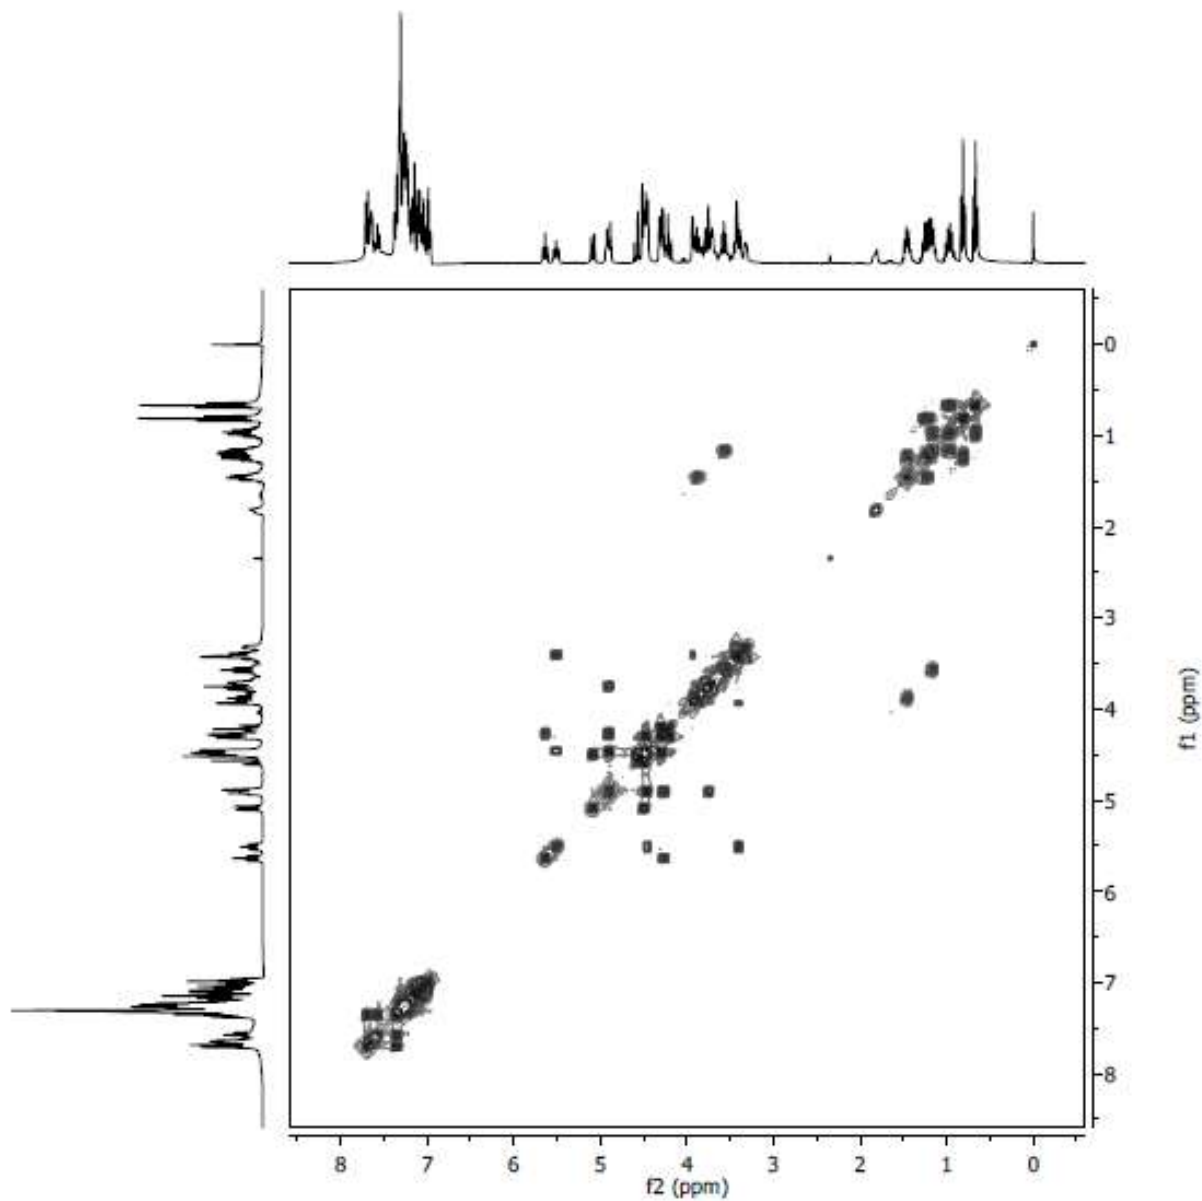

CDCl<sub>3</sub> 300 MHz

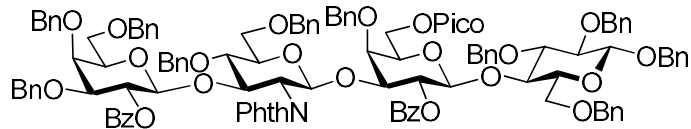

11

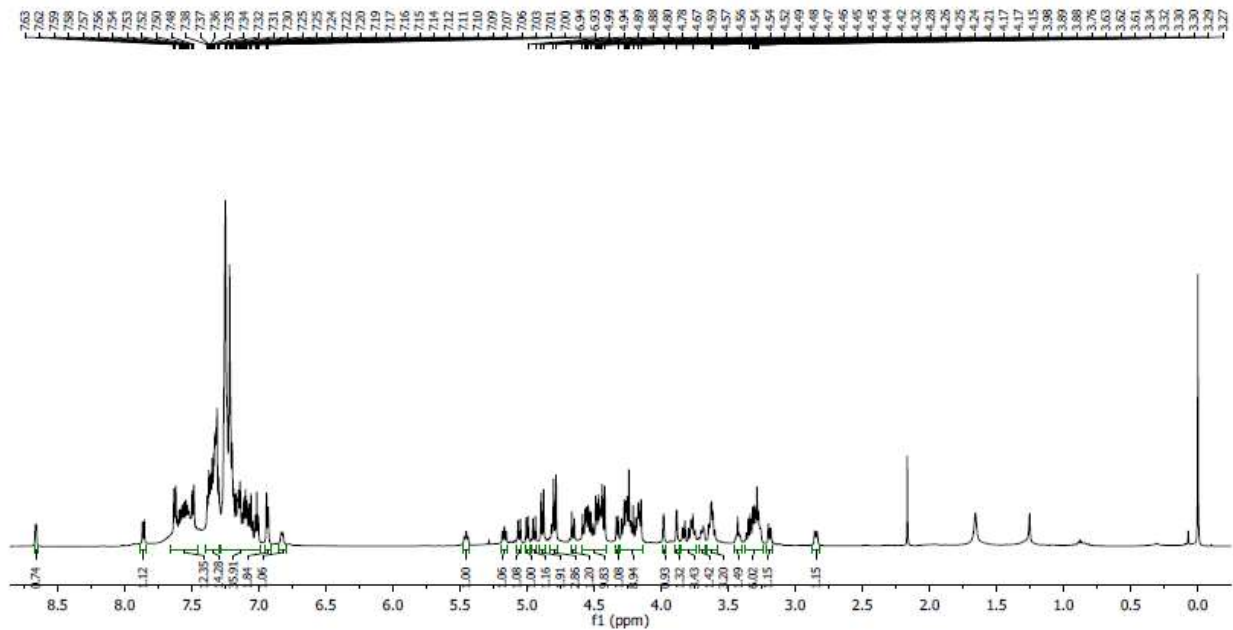

$\text{CDCl}_3$  600 MHz

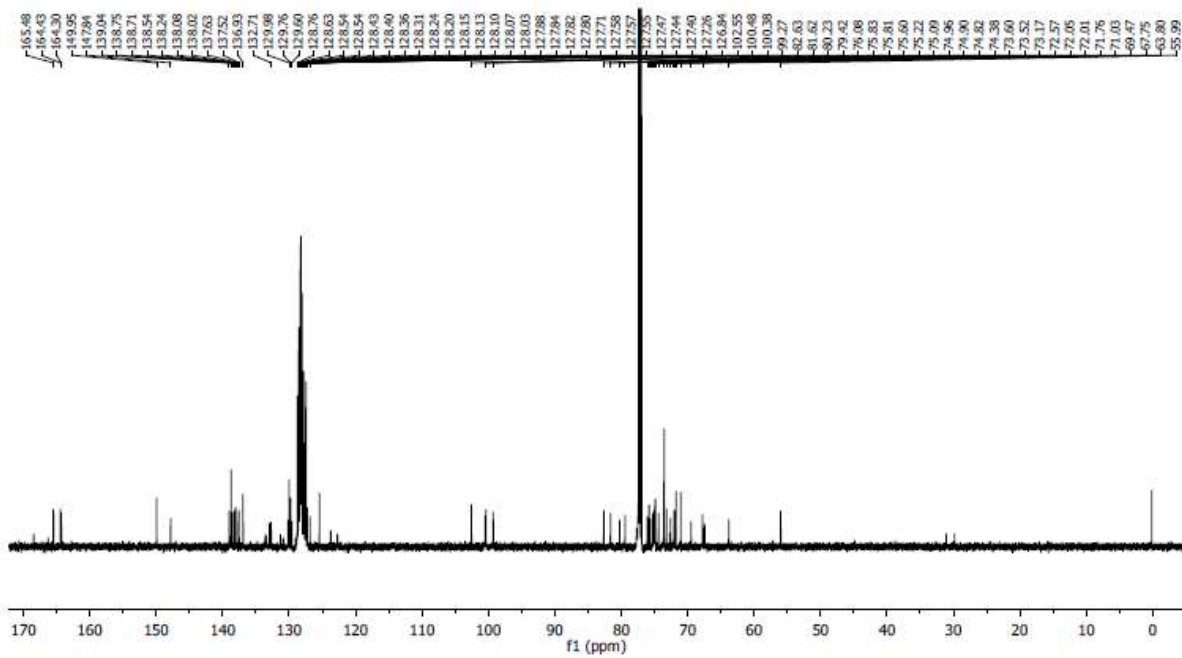

$\text{CDCl}_3$  151 MHz

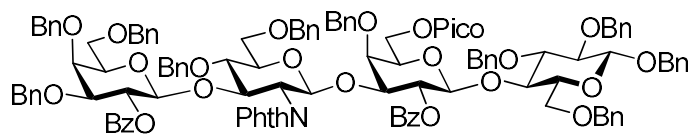

11

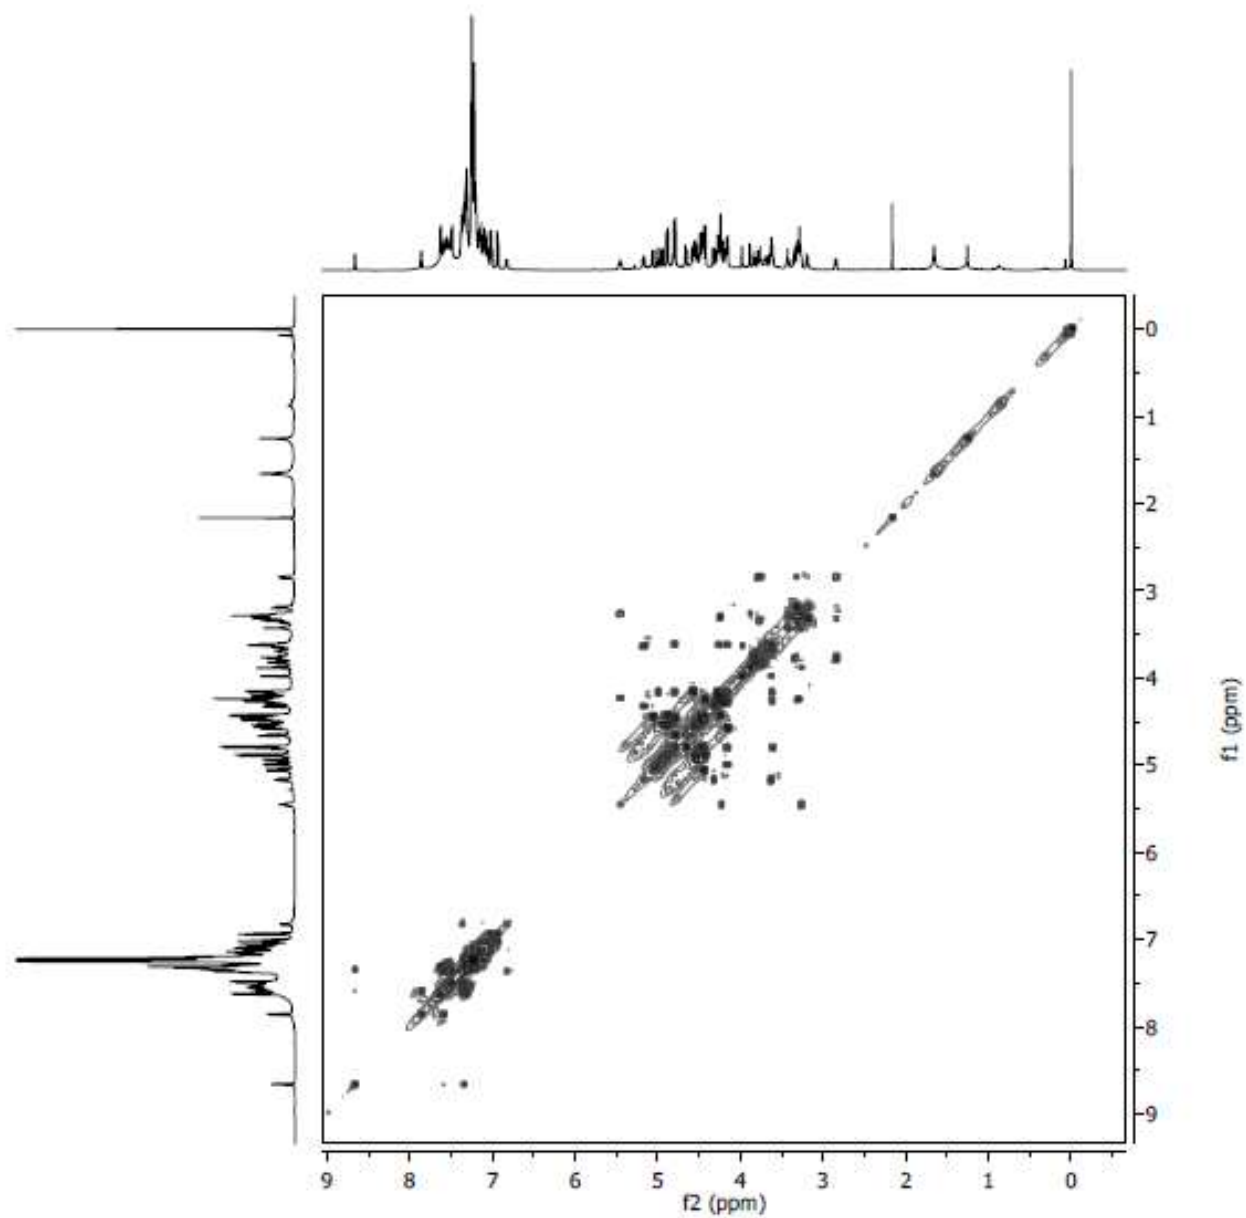

CDCl<sub>3</sub> 600 MHz

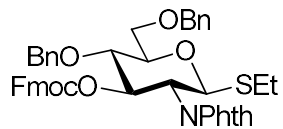

12

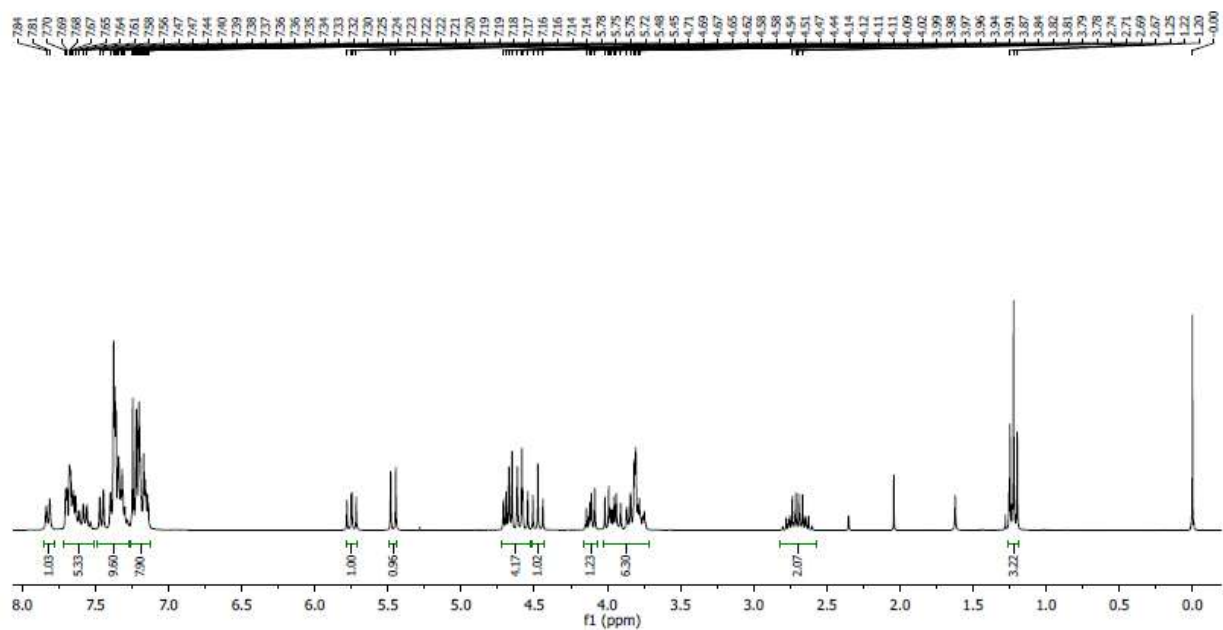

CDCl<sub>3</sub> 300 MHz

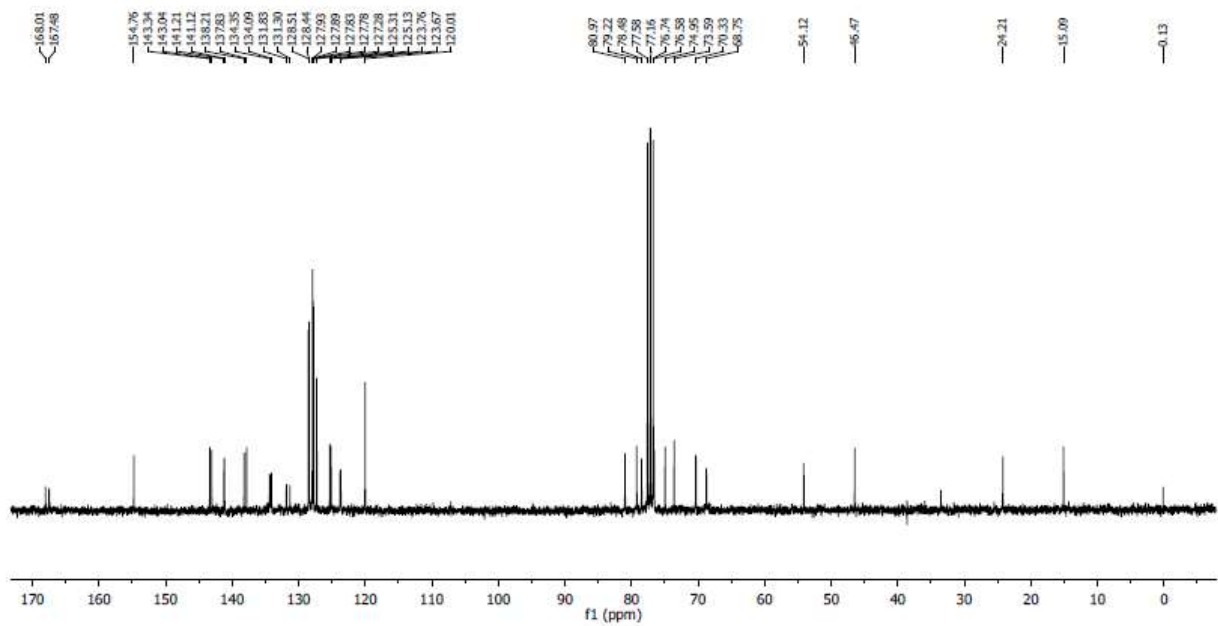

CDCl<sub>3</sub> 75 MHz



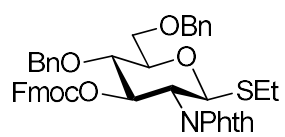

12

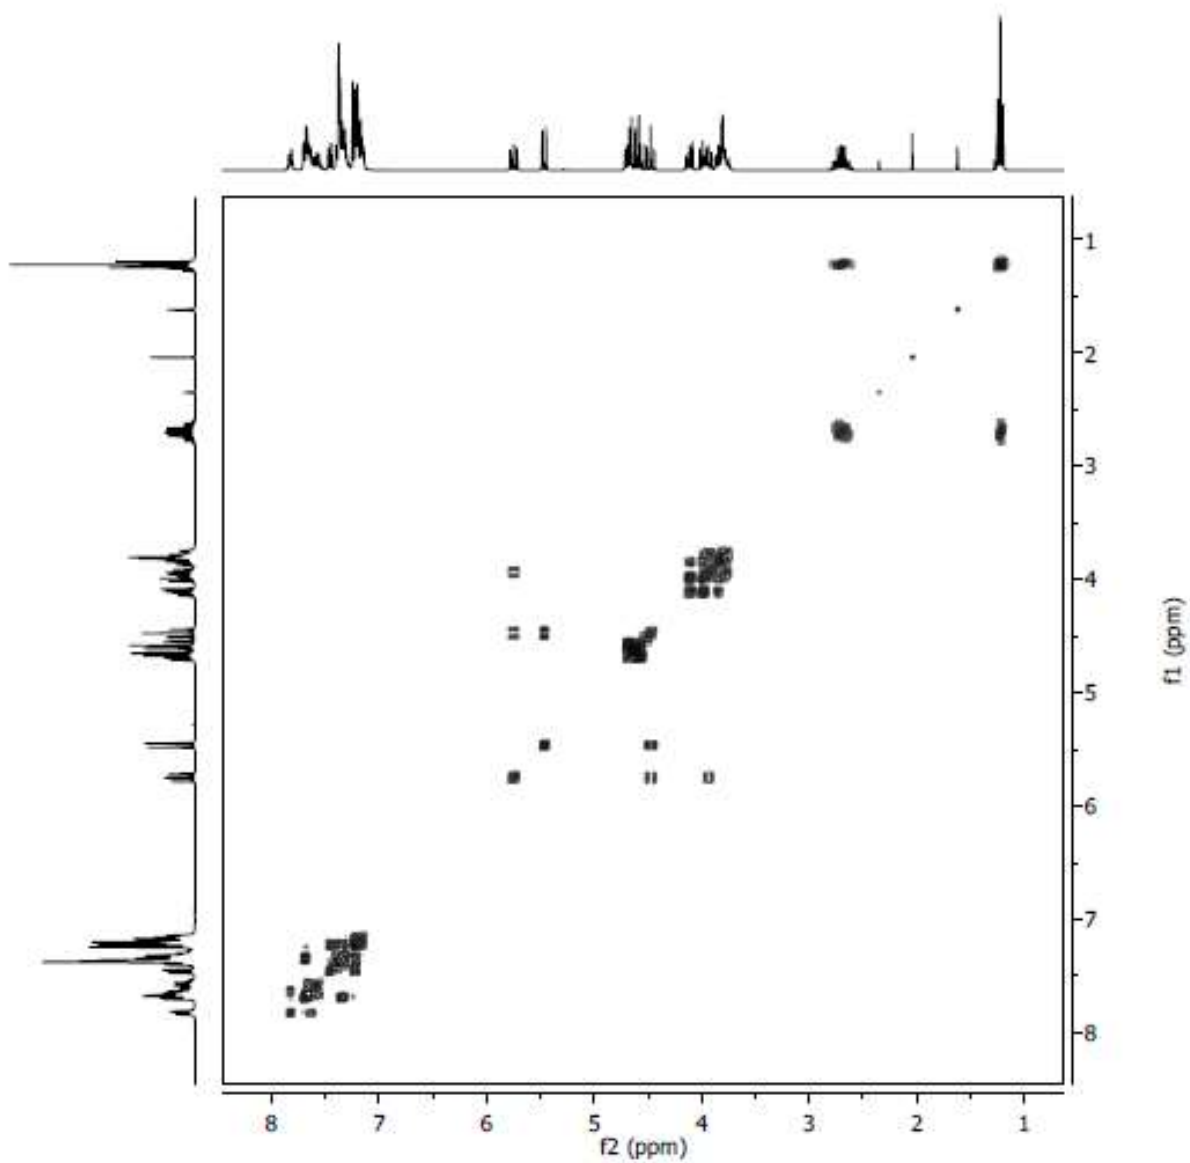

CDCl<sub>3</sub> 300 MHz

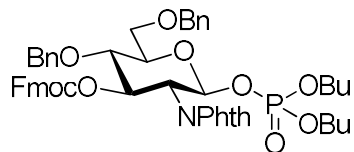

13

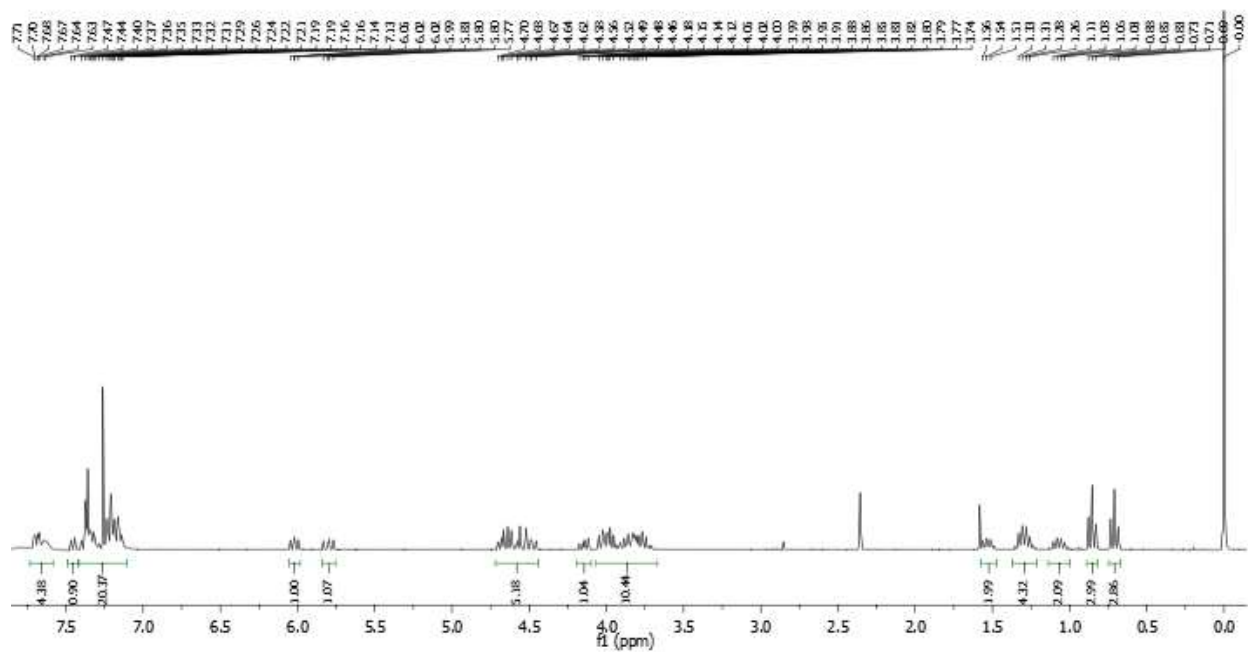

CDCl<sub>3</sub> 300 MHz

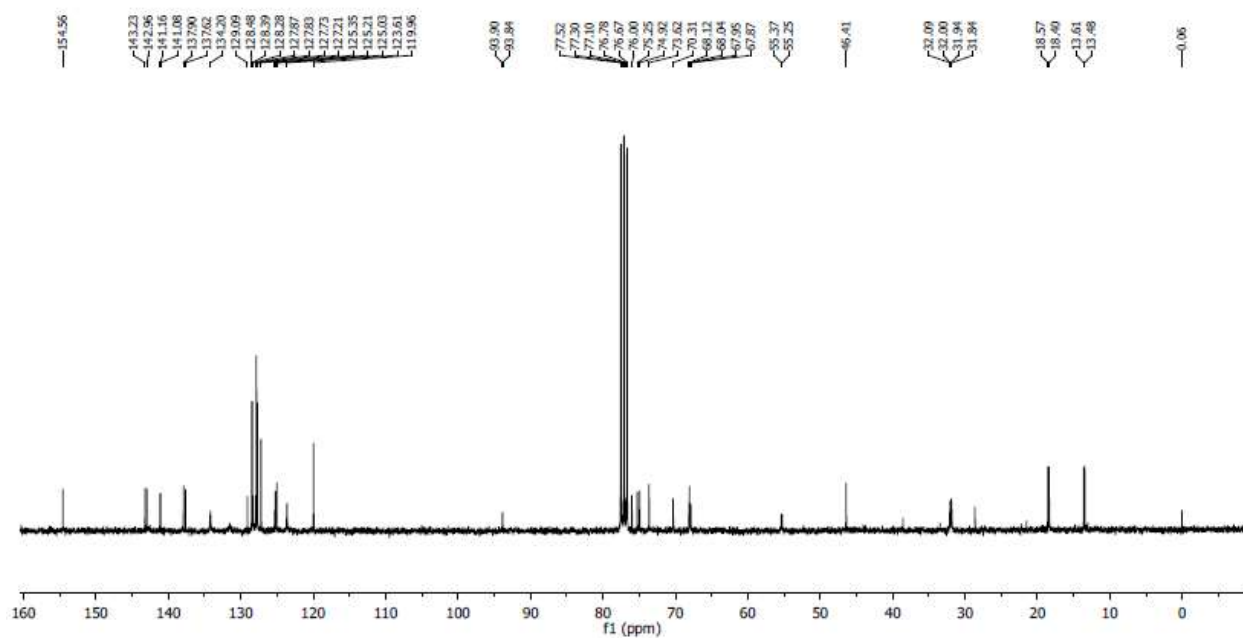

CDCl<sub>3</sub> 75 MHz



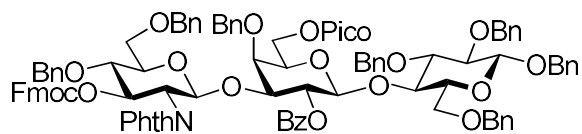

14

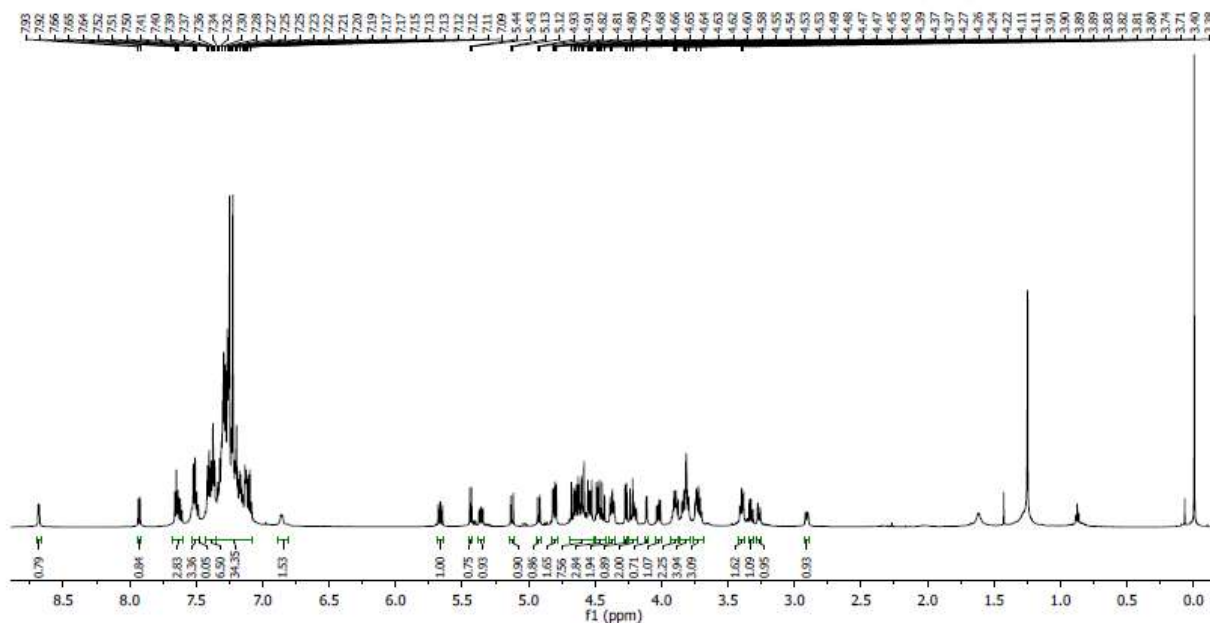

CDCl<sub>3</sub> 600 MHz

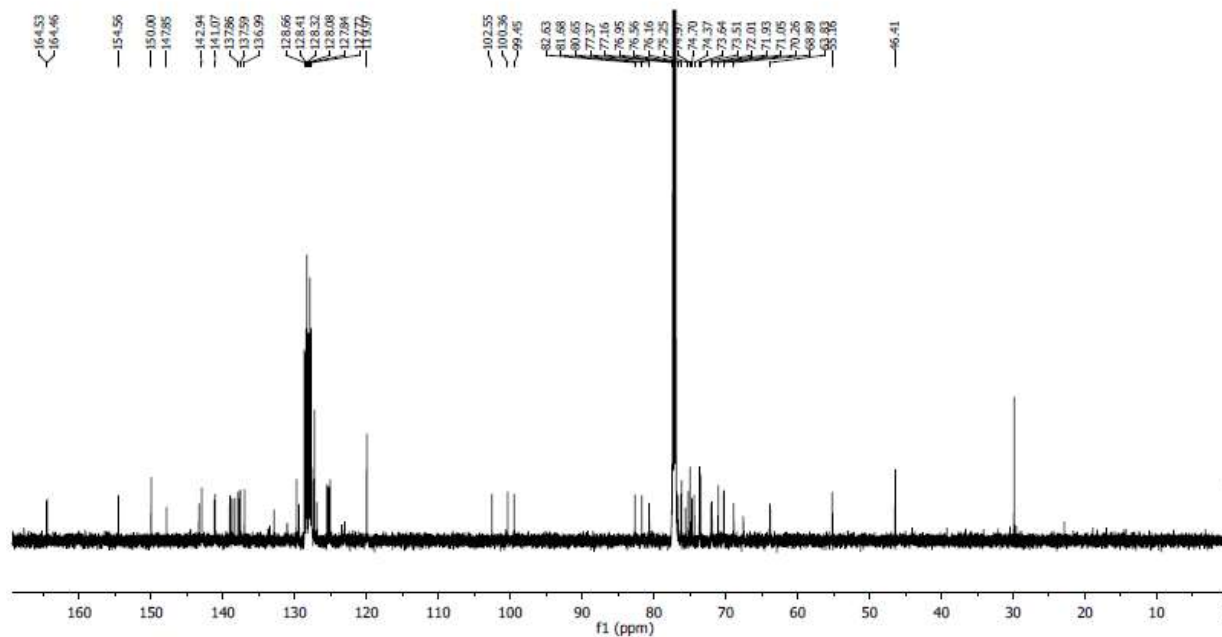

CDCl<sub>3</sub> 151 MHz



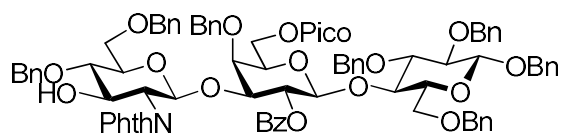

15

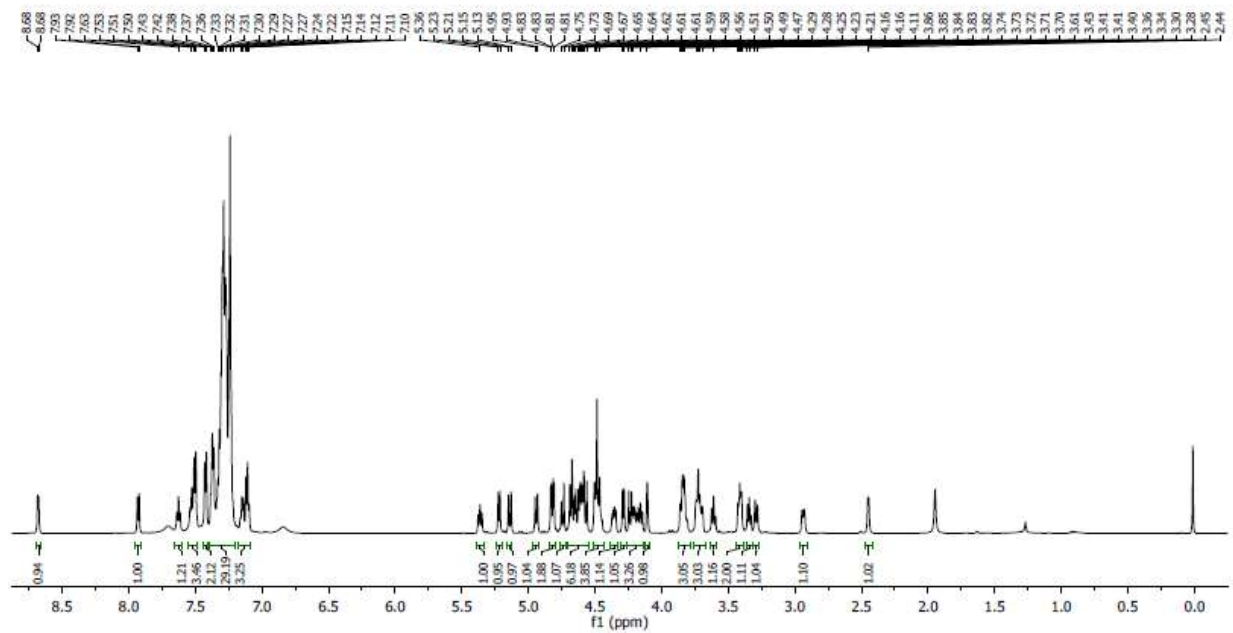

CDCl<sub>3</sub> 600 MHz

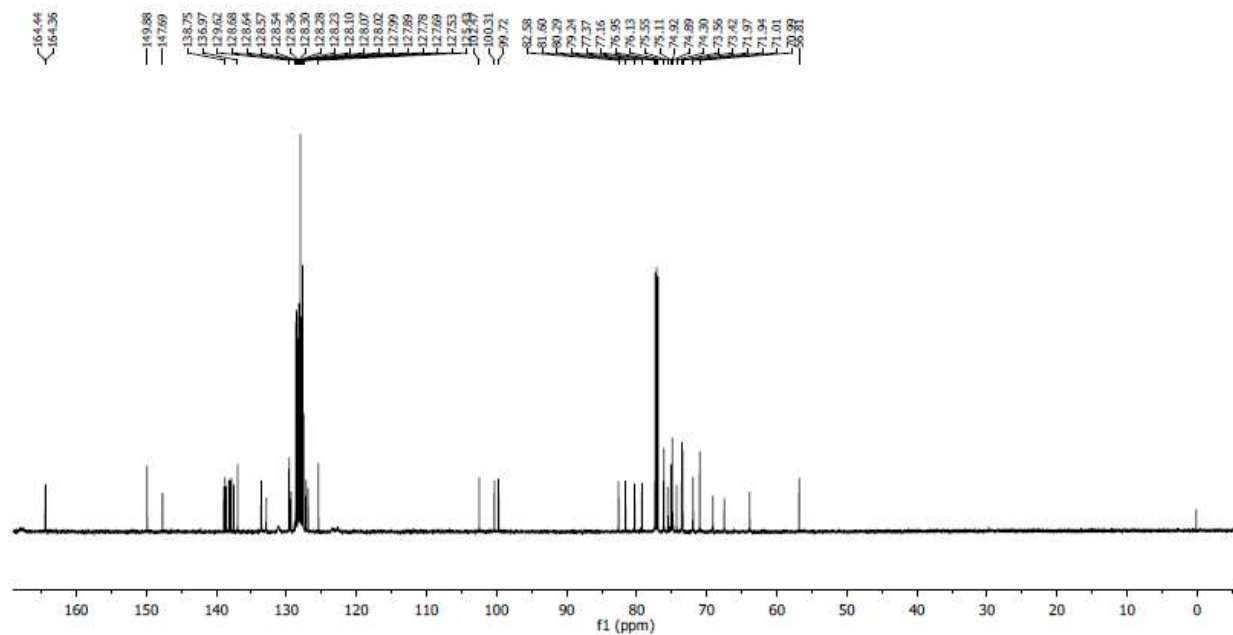

CDCl<sub>3</sub> 151 MHz

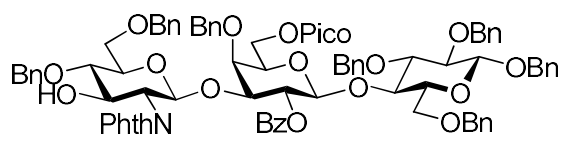

15

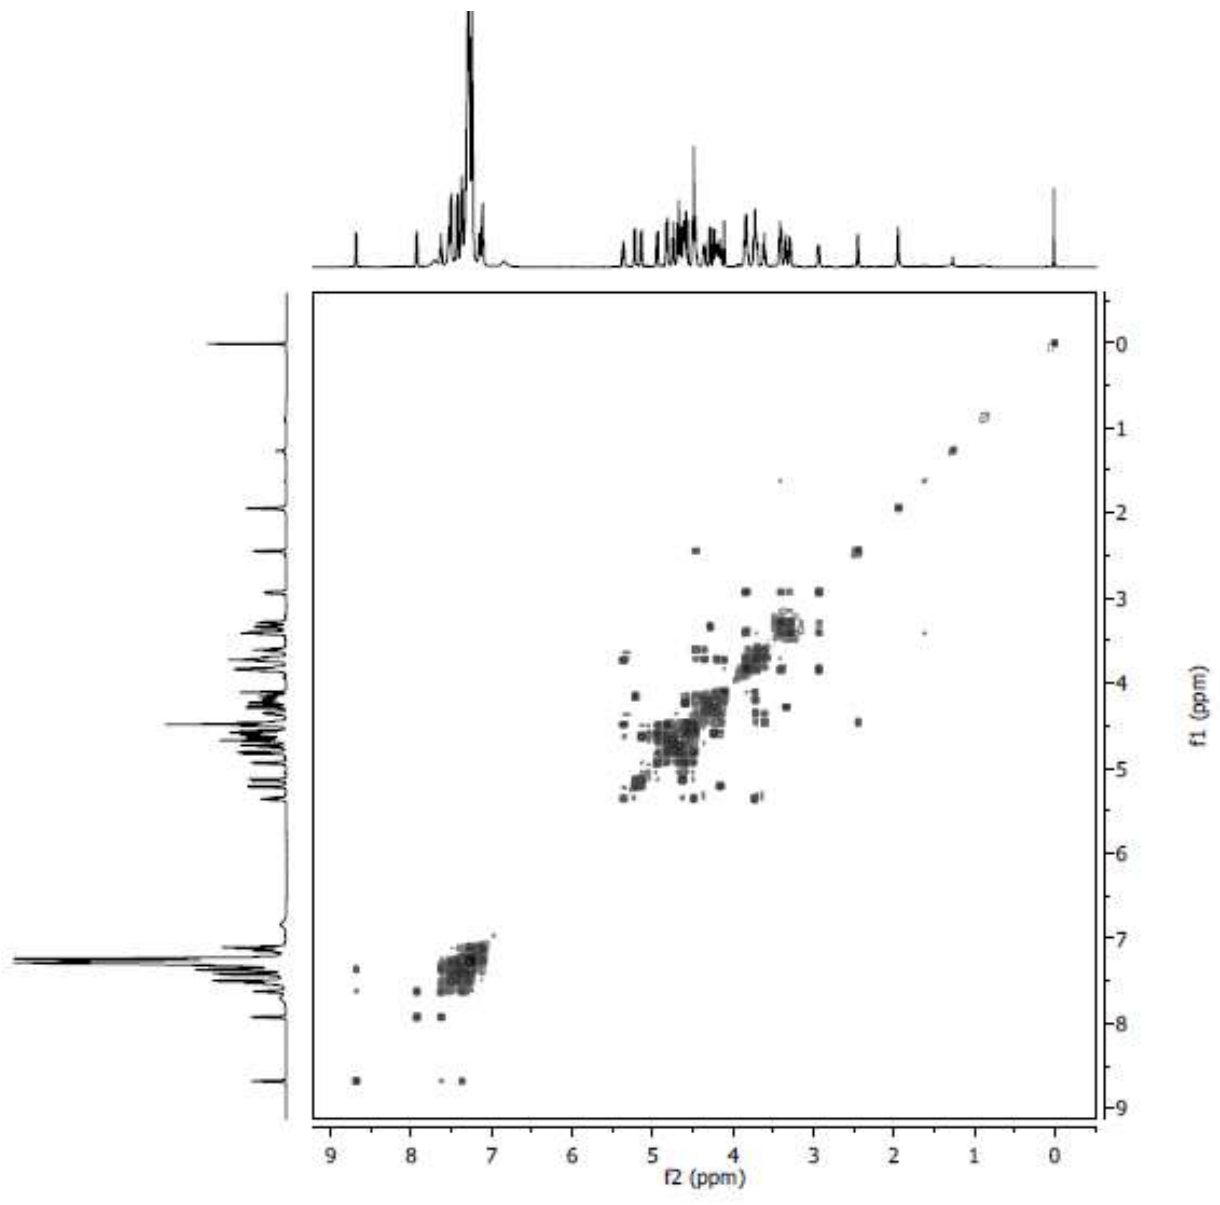

CDCl<sub>3</sub> 600 MHz

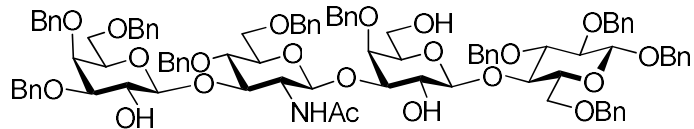

16

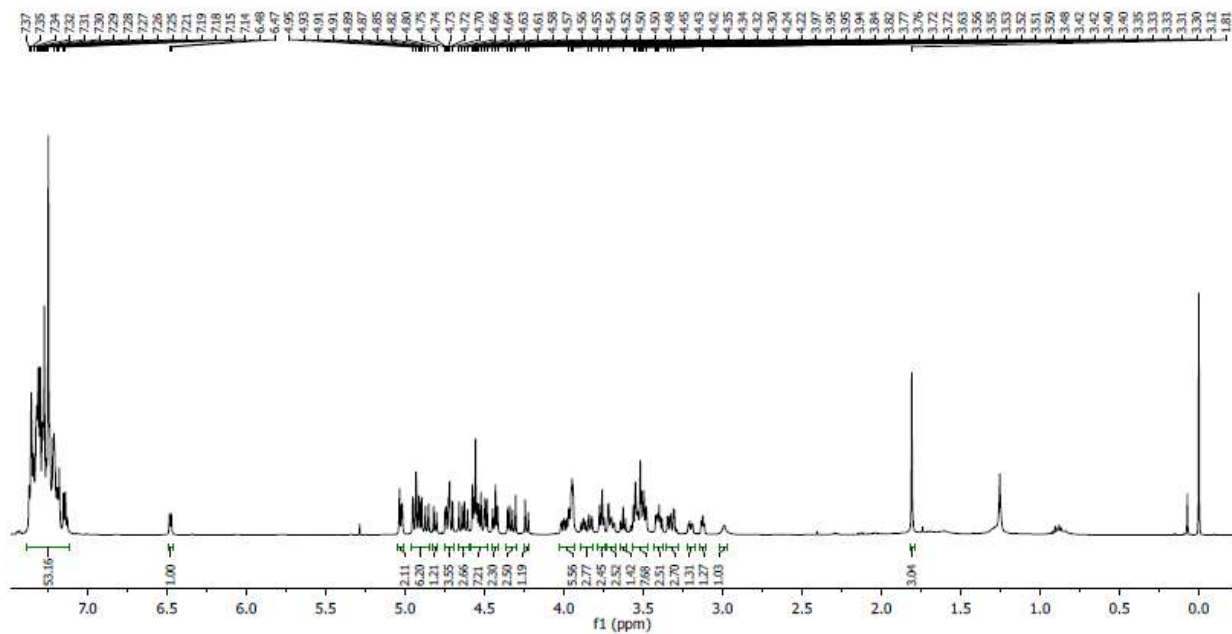

CDCl<sub>3</sub> 600 MHz

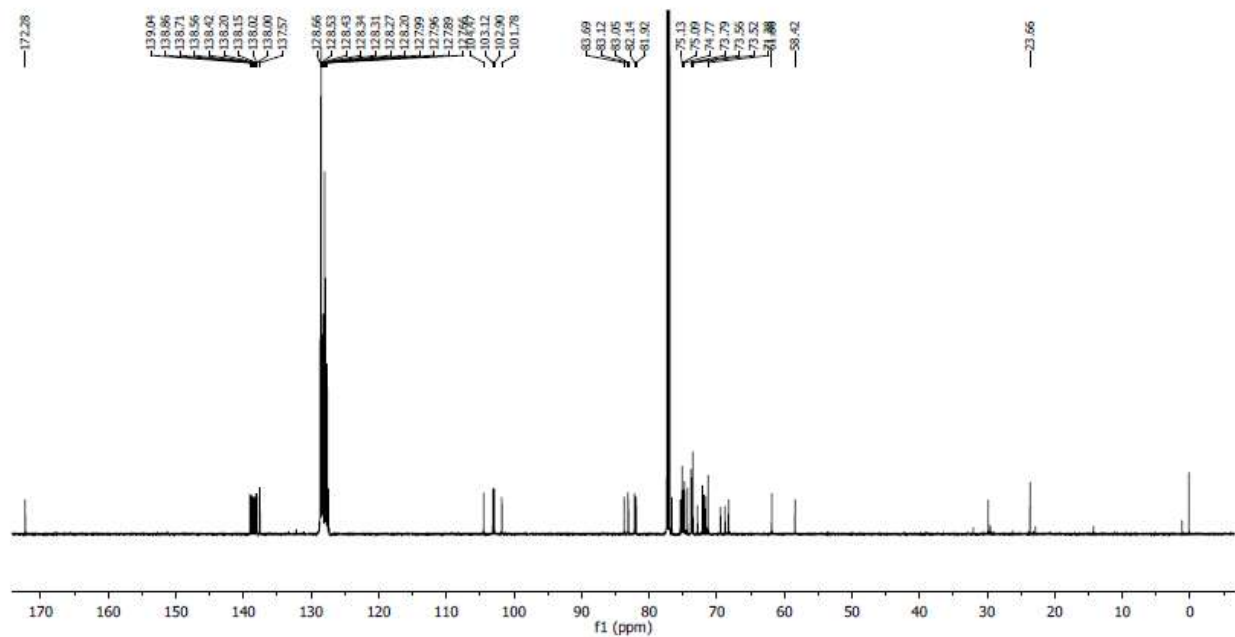

CDCl<sub>3</sub> 151 MHz







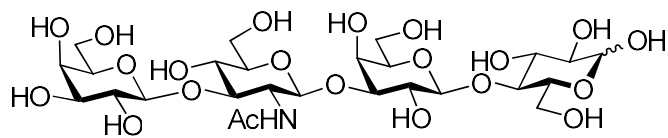

1

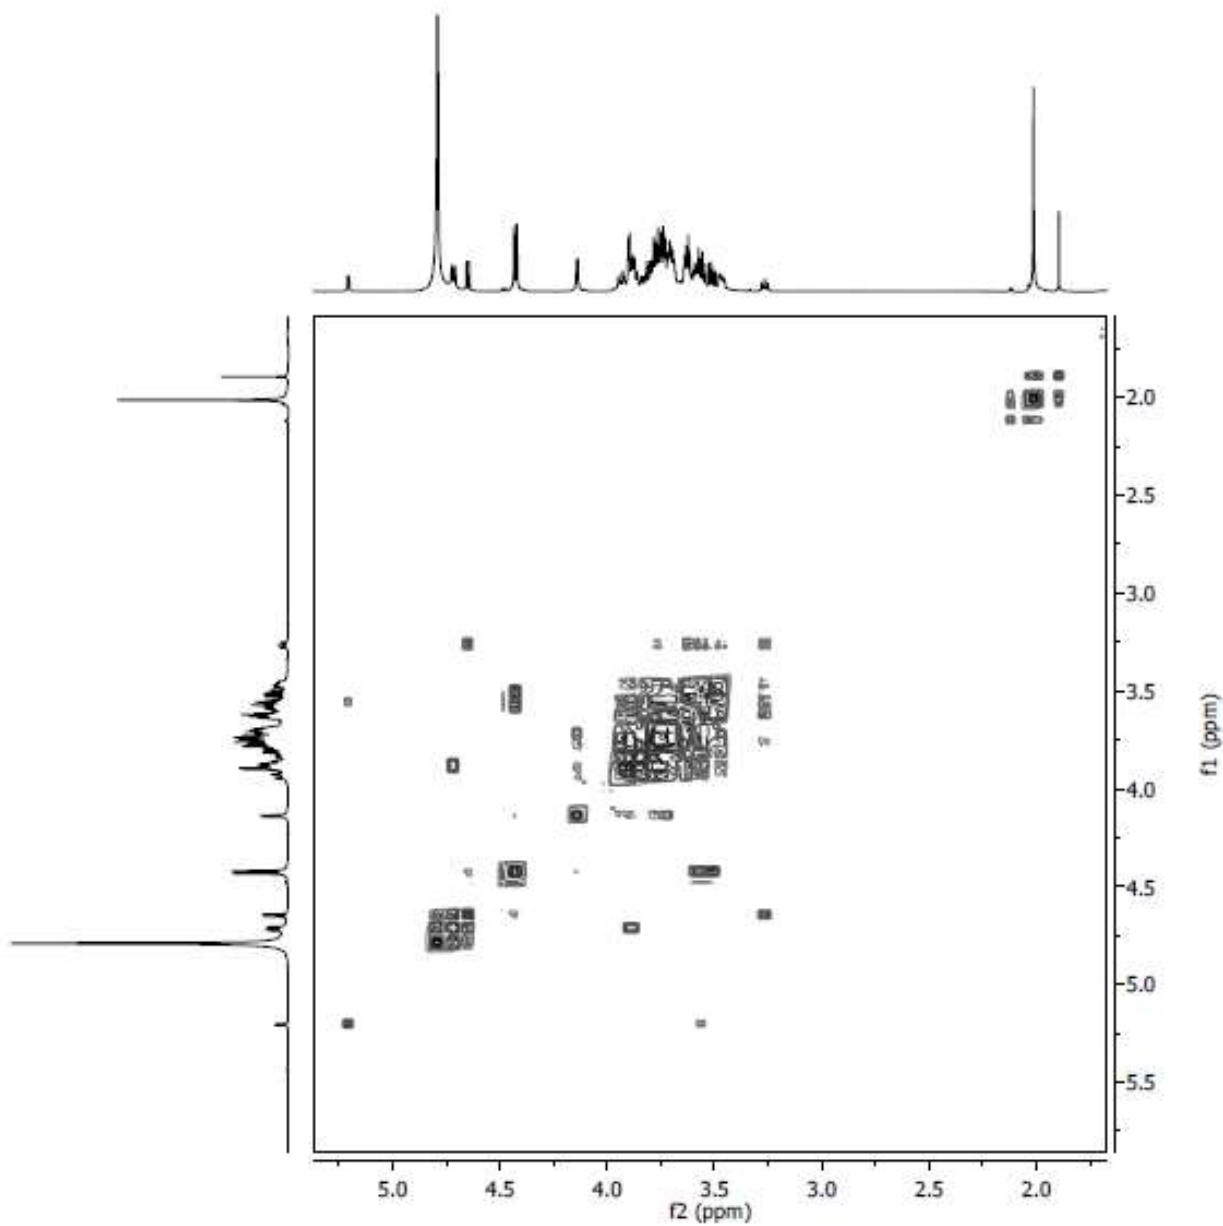

D<sub>2</sub>O 600 MHz
